# Supplementary material for: Contribution of hydroxymethanesulfonate (HMS) to severe winter haze in the North China Plain
Source: Copernicus journal article supplement (doi:10.5194/acp-2020-113), 2020-02-13
Supplement: Supplementary file 1 [file acp-2020-113-supplement.pdf]

1 *Supplement of*  
2 **Contribution of hydroxymethanesulfonate (HMS) to severe winter haze in the**  
3 **North China Plain**  
4  
5 **Tao Ma et al.**  
6  
7 *Correspondence to:* Fengkui Duan (duanfk@mail.tsinghua.edu.cn) and Kebin He  
8 (hekb@tsinghua.edu.cn)

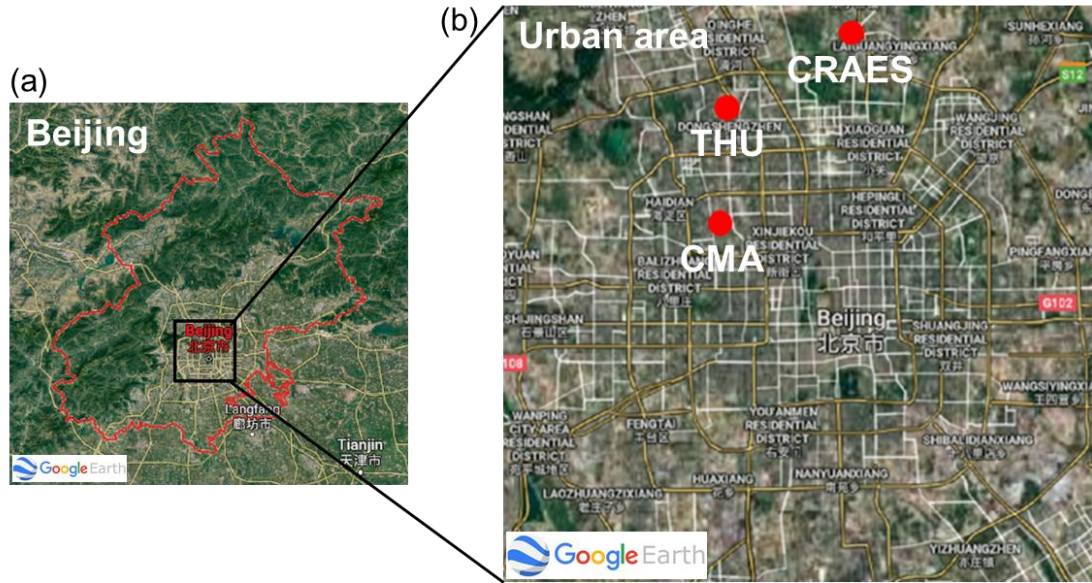

9

**Figure S1.** Location of observational sites in urban Beijing. **(a)** Map of Beijing (© Google Earth) **(b)** Observational sites in the urban area of Beijing (© Google Earth). The THU, CMA, and CRAES sites represent the Tsinghua University ( $40.00^{\circ}\text{N}$ ,  $116.34^{\circ}\text{E}$ ), the Chinese Academy of Meteorological Sciences ( $39.95^{\circ}\text{N}$ ,  $116.33^{\circ}\text{E}$ ), and the Chinese Research Academy of Environmental Sciences ( $40.05^{\circ}\text{N}$ ,  $116.42^{\circ}\text{E}$ ), respectively.

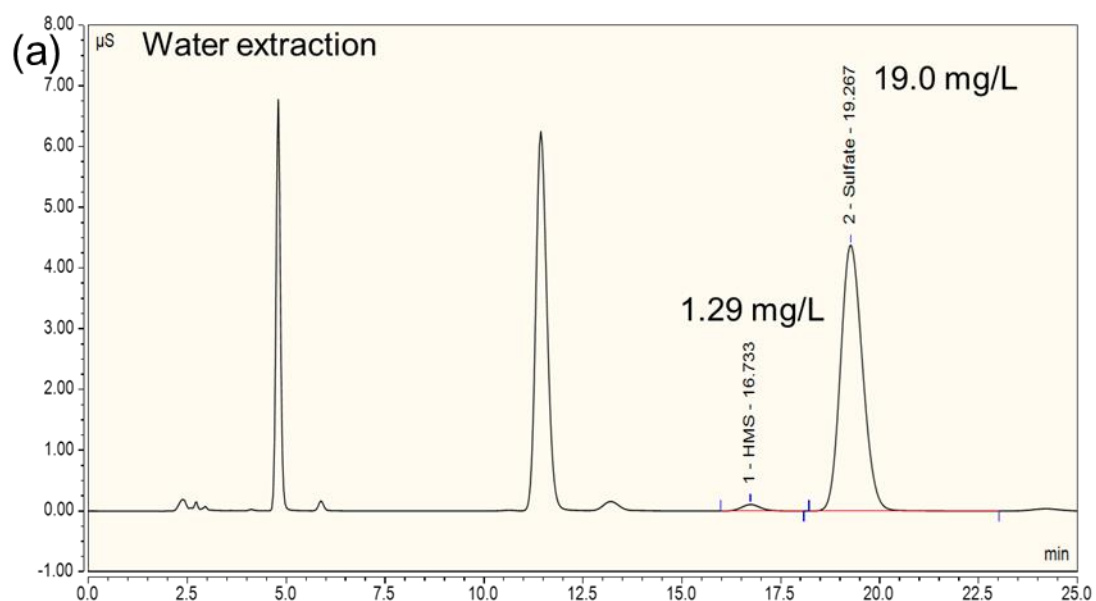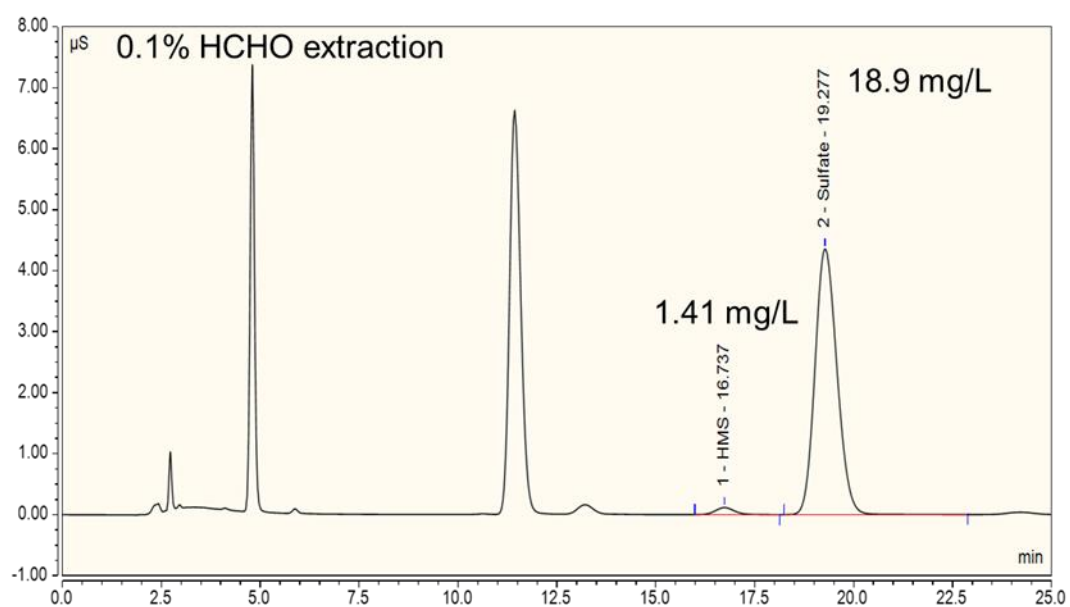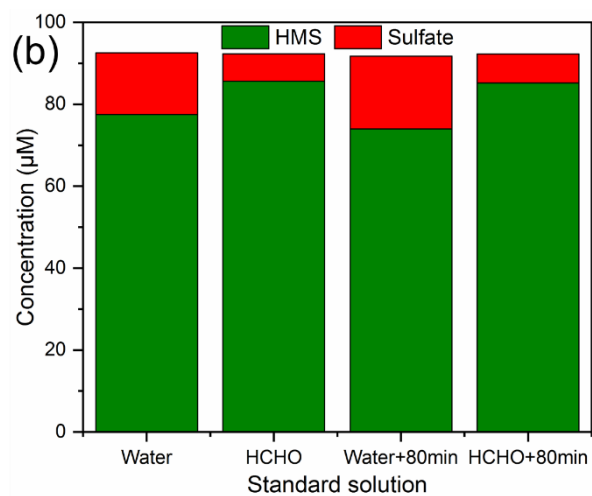

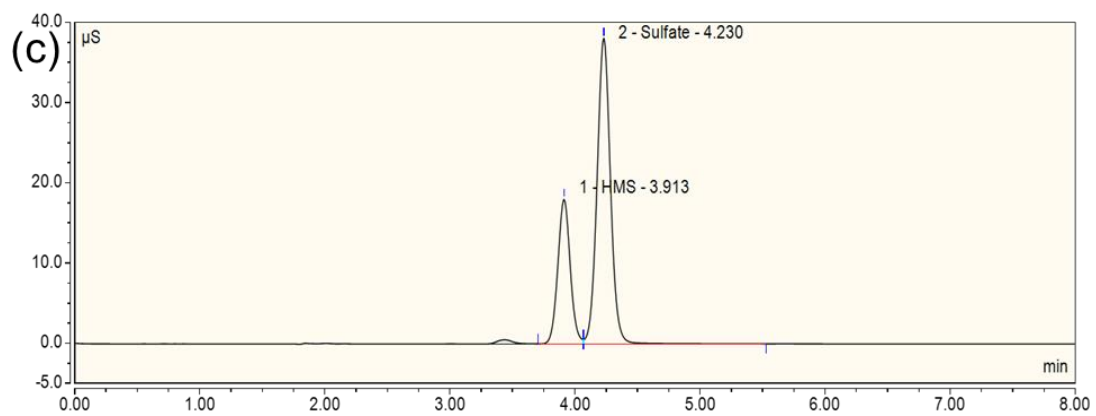

17

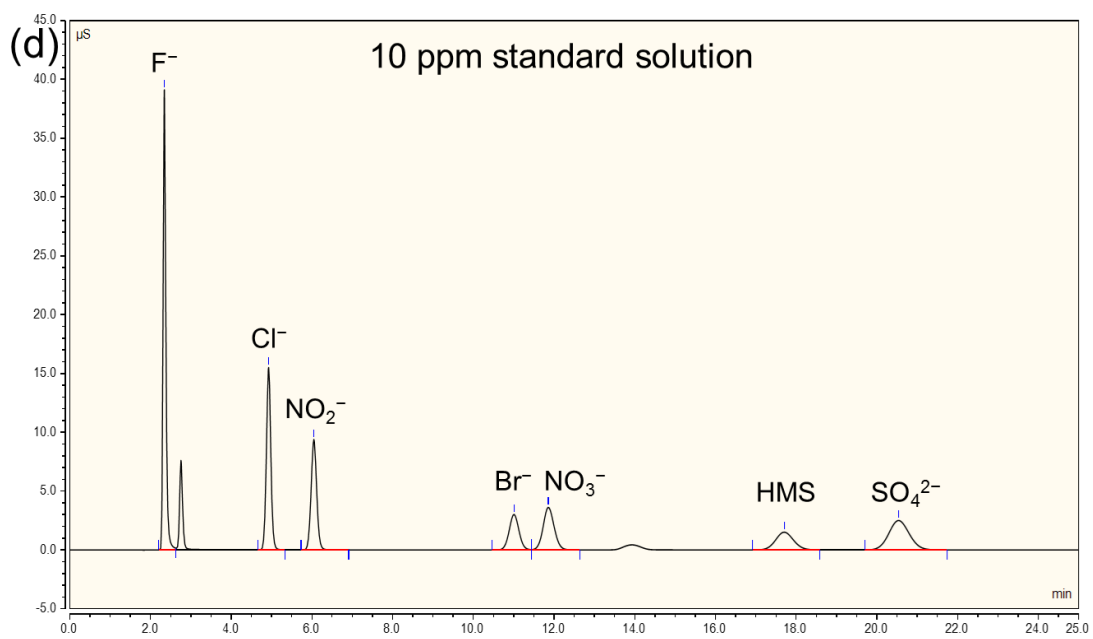

18

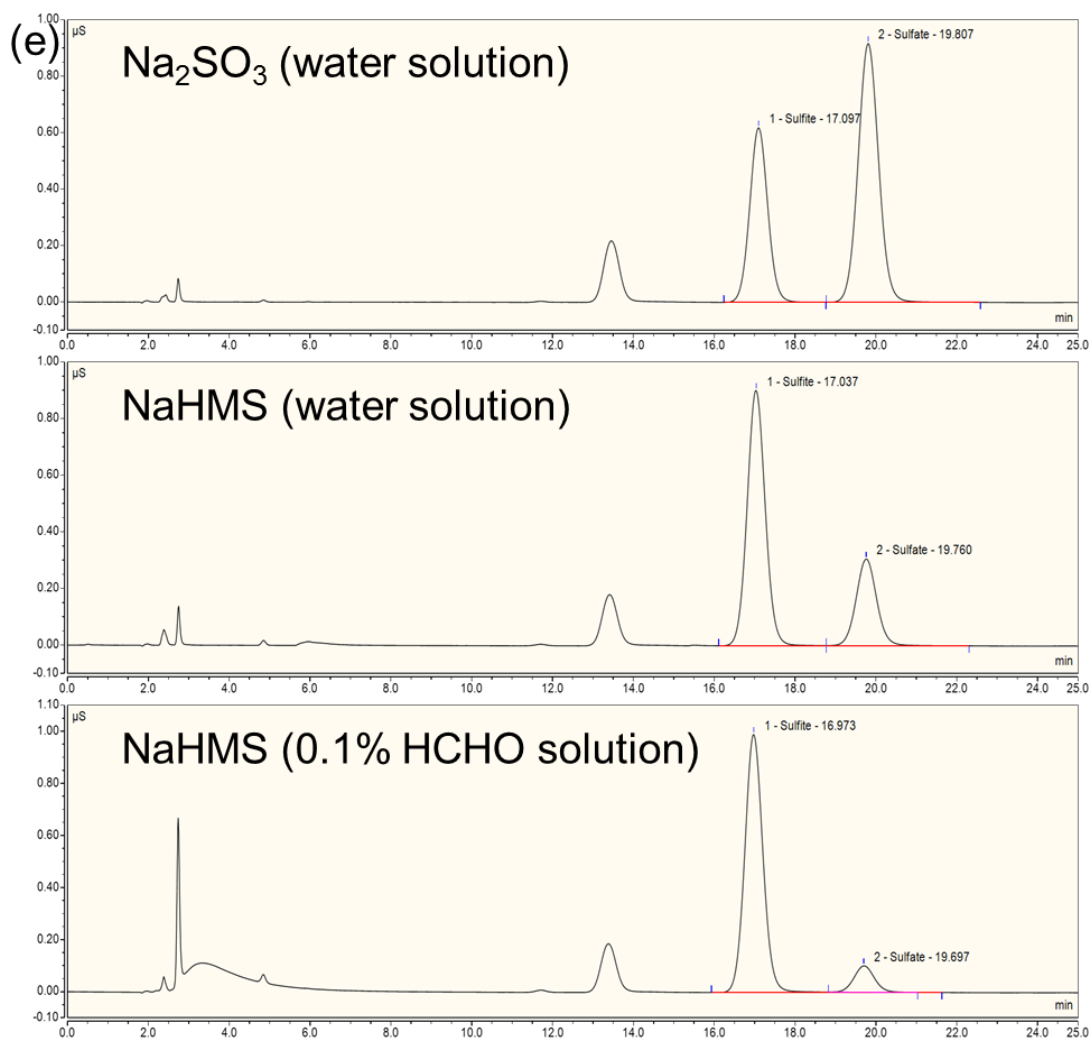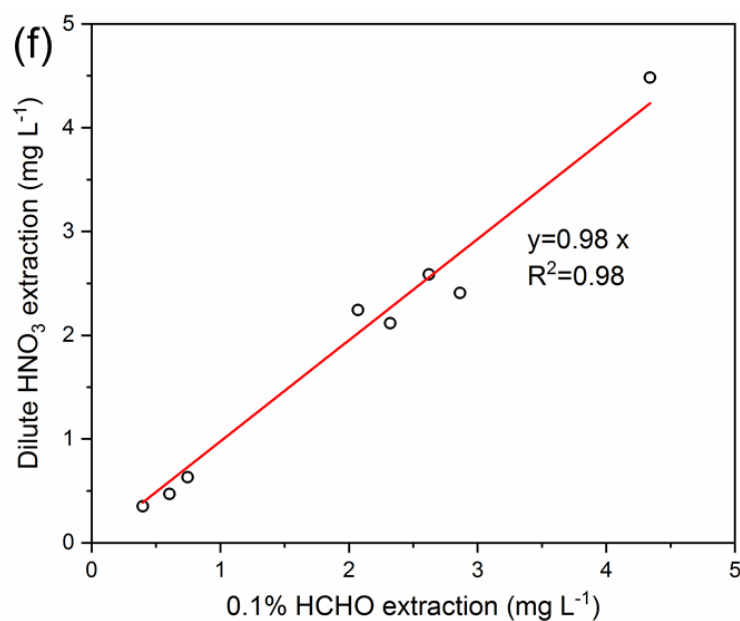

**Figure S2.** HMS quantification by ion chromatography. (a) Comparison of sample ion chromatography spectrum after water extraction and 0.1% HCHO extraction. The ion chromatography is conducted immediately after sample extraction. (b) Evolution of

HMS standard solution (purity: 97%) over time in water extraction and 0.1% HCHO extraction. (c) Separation of HMS and sulfate in AS11-HC column with 30 mM KOH eluent. (d) Ion chromatogram spectrum of a 10 ppm mixed standard solution in the AS11-HC column with 11 mM KOH eluent. (e) Ion chromatography spectrum of standard Na<sub>2</sub>SO<sub>3</sub>, NaHMS, and NaHMS+0.1% HCHO solution. The retention time of Na<sub>2</sub>SO<sub>3</sub> (purity: ≥98%), NaHMS (purity: 97%), and NaHMS+0.1% HCHO samples are same. (f) Comparison between HMS concentration in dilute nitric acid (pH≈3) extraction and total S(IV) concentration in 0.1% HCHO extraction in PM<sub>2.5</sub> samples. The concentrations in both extractions are sulfite-equivalent concentration.

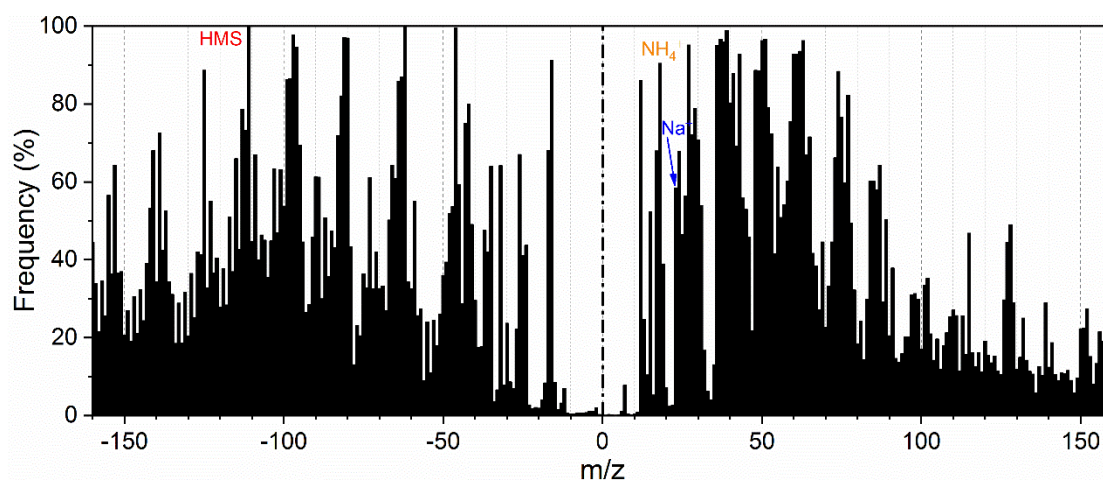

**Figure S3.** Positive and negative digital histograms of HMS-containing particles. The digital histogram represents the frequency of individual particles present at each  $m/z$ .

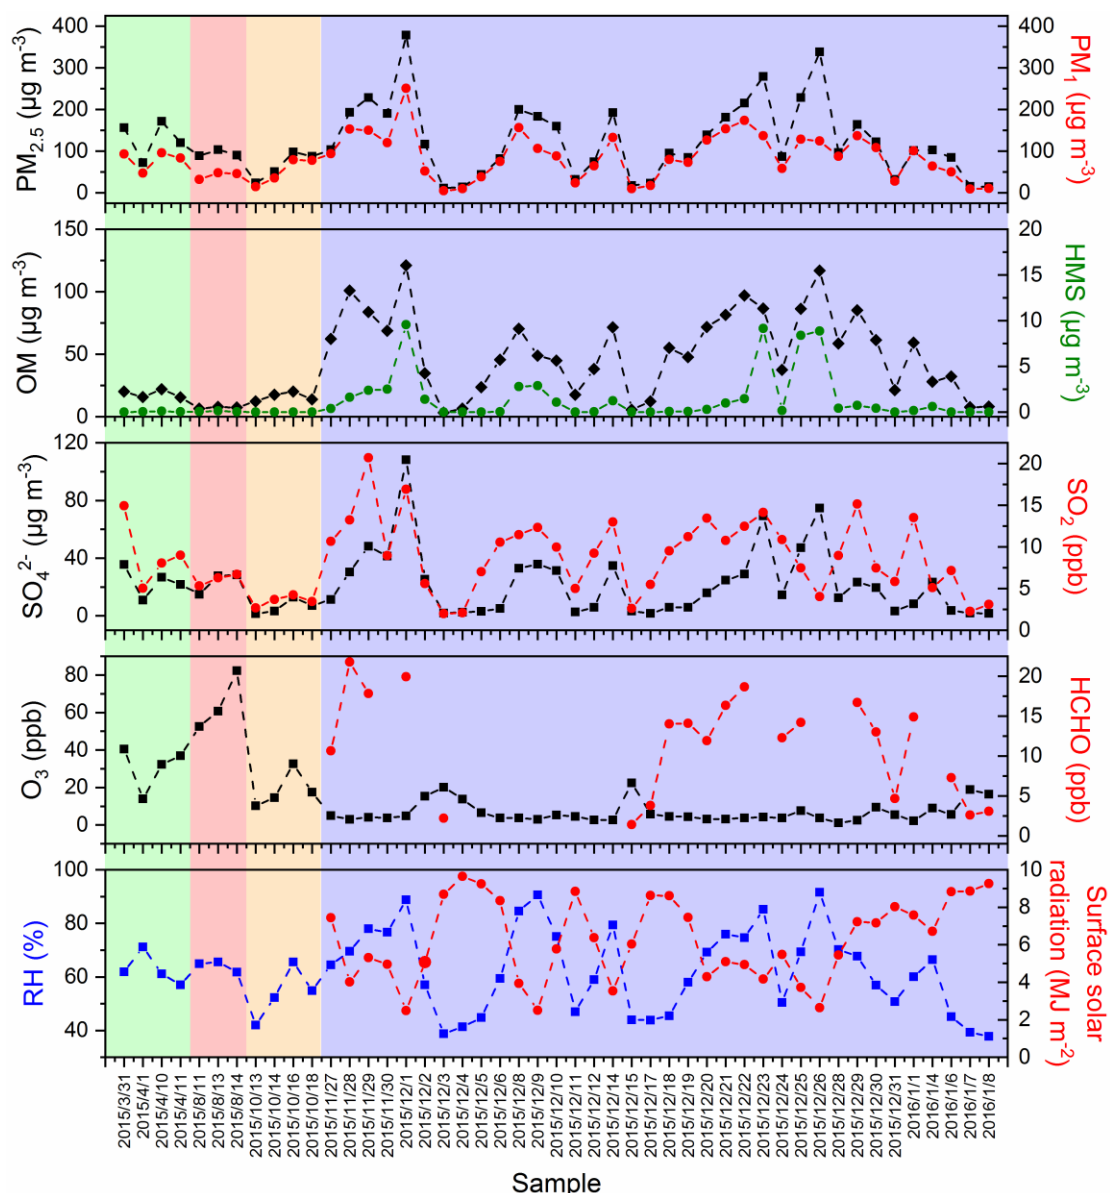

**Figure S4.** Characteristics of offline samples in 2015. Variation of PM<sub>2.5</sub>, PM<sub>1</sub>, organic matter (OM), HMS, SO<sub>4</sub><sup>2-</sup>, SO<sub>2</sub>, O<sub>3</sub>, HCHO, relative humidity (RH) and total surface solar radiation in different seasons of 2015. OM is estimated as 1.6 times of OC. The green, pink, yellow and blue shades represent daily samples of spring, summer, autumn, and winter, respectively. SO<sub>4</sub><sup>2-</sup> and HMS concentrations are derived from offline PM<sub>2.5</sub> samples measured by the optimized ion chromatography method, while other parameters are averages of online hourly data during sampling periods.

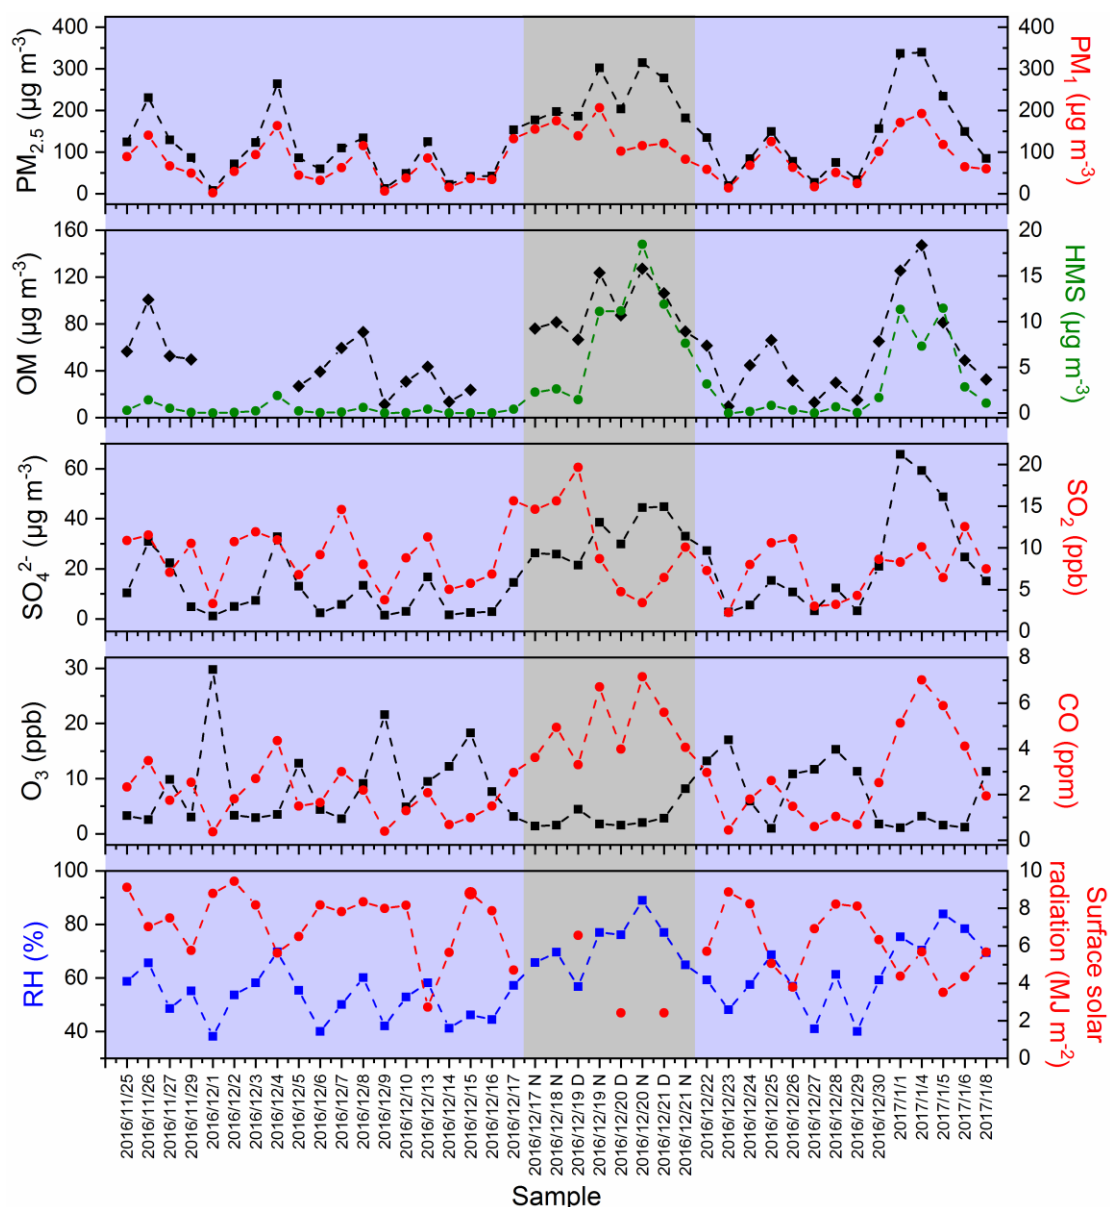

**Figure S5.** Characteristics of offline samples in winter 2016. Variation of PM<sub>2.5</sub>, PM<sub>1</sub>, organic matter (OM), HMS, SO<sub>4</sub><sup>2-</sup>, SO<sub>2</sub>, O<sub>3</sub>, CO, relative humidity (RH) and total surface solar radiation in winter 2016. OM is estimated as 1.6 times of OC. The blue shade represents daily samples, and the gray shade represents half-day samples, where D and N correspond to samples collected during daytime and nighttime, respectively. SO<sub>4</sub><sup>2-</sup> and HMS concentrations are derived from offline PM<sub>2.5</sub> samples measured by the optimized ion chromatography method, while other parameters are averages of online hourly data during sampling periods.



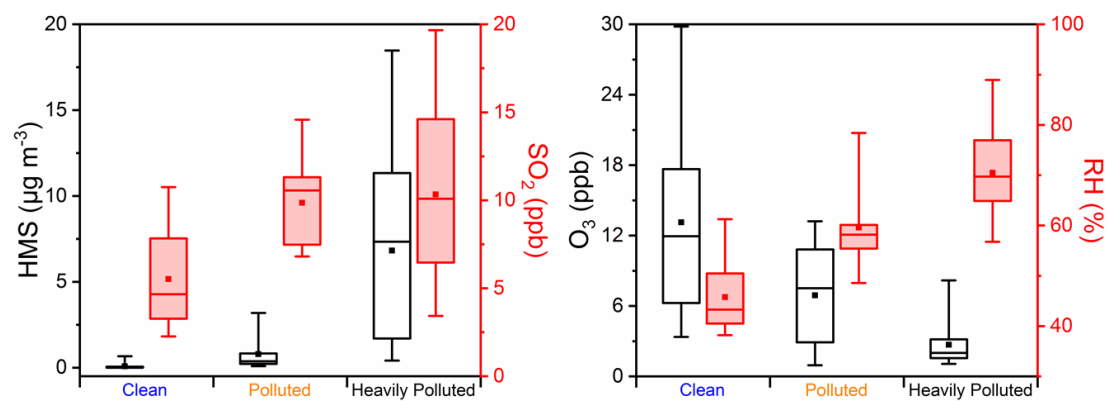

**Figure S6.** Evolution of HMS in Beijing winter of 2016. HMS, SO<sub>2</sub>, O<sub>3</sub>, and relative humidity (RH) at different pollution levels from 24 November 2016 to 8 January 2017.

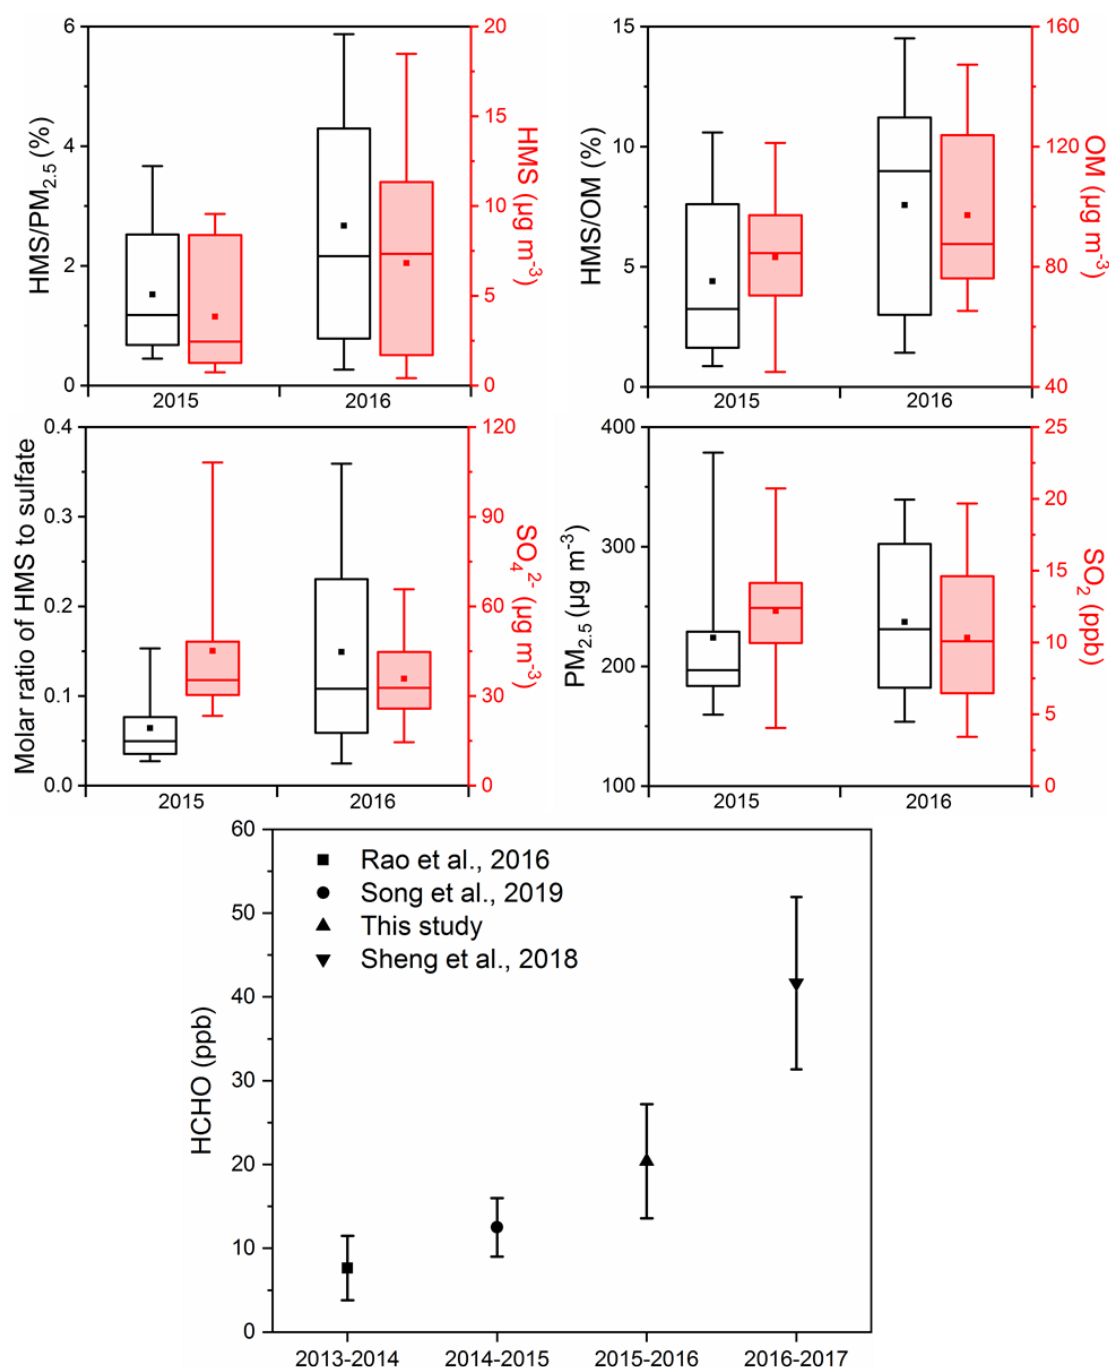

**Figure S7.** Change of haze characteristics in Beijing winter from 2015 to 2016. Variation of HMS/PM<sub>2.5</sub>, HMS, HMS/OM, OM, the molar ratio of HMS to sulfate, SO<sub>4</sub><sup>2-</sup>, PM<sub>2.5</sub>, and SO<sub>2</sub> in Beijing winter from 2015 to 2016. OM is estimated as 1.6 times of OC. Variations in HCHO levels during winter hazes in Beijing during 2013–2017. The HCHO concentrations in 2013–2014, 2014–2015, and 2016–2017 winter are derived from the work by Rao et al. (Rao et al., 2016), Song et al. (Song et al., 2019), and Sheng et al. (Sheng et al., 2018), respectively.

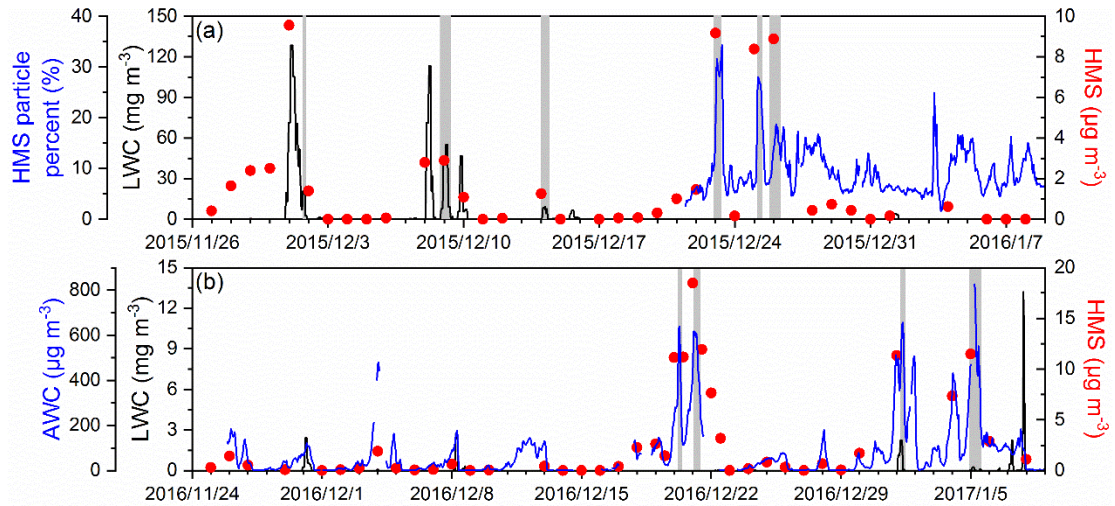

**Figure S8.** Relationship between HMS events and cloud/fog/aerosol water in Beijing winter. **(a)** Time series of HMS concentration, HMS-containing particle percentage, and cloud/fog liquid water content (LWC) in winter 2015. LWC is obtained from the MERRA-2 (Modern-Era Retrospective analysis for Research and Applications, Version 2) reanalysis meteorology (Gelaro et al., 2017). The average LWC below the planetary boundary layer height over the Beijing area is calculated and shown. The gray shades represent the possible presence of fog events ( $RH > 90\%$ ). **(b)** Time series of HMS concentration, aerosol water content (AWC), and cloud/fog liquid water content (LWC) in winter 2016.

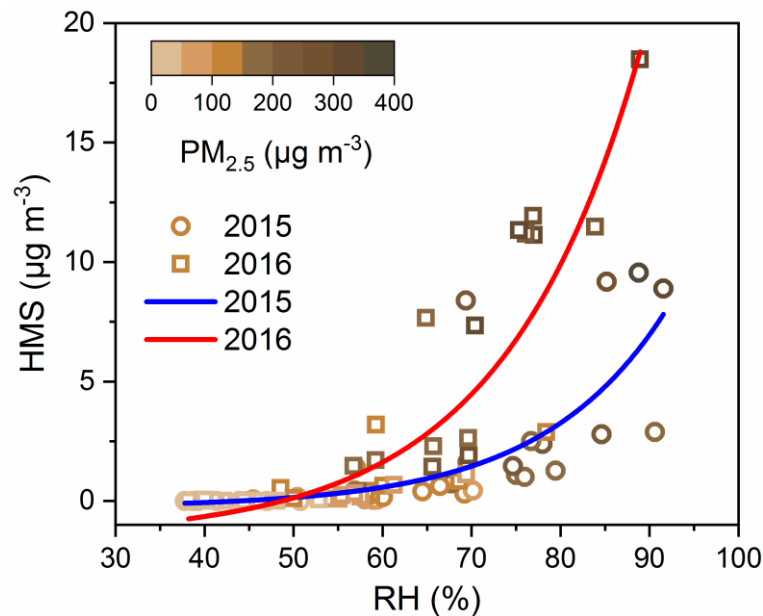

**Figure S9.** Effects of RH on HMS formation. Correlation between RH and HMS concentration in the winter of 2015 and 2016. The markers represent HMS concentrations and are colored by the  $PM_{2.5}$  concentrations. The blue and red curve represents the exponential fitting between RH and HMS concentration in 2015 and 2016, i.e.,  $y = -0.27 + 1.2 \times 10^{-2} e^{0.072x}$  ( $R^2 = 0.56$ ) and  $y = -1.51 + 6.5 \times 10^{-2} e^{0.065x}$  ( $R^2 =$

0.78), respectively.

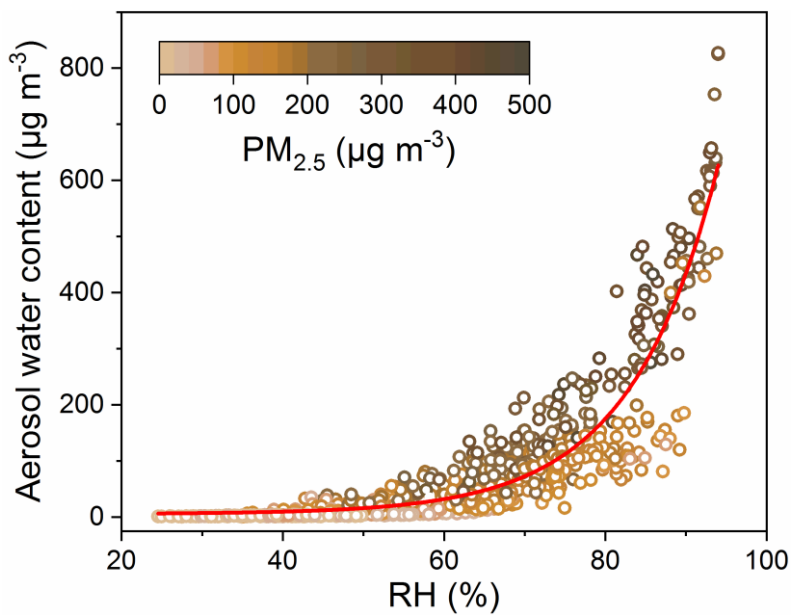

**Figure S10.** Relationship between RH and aerosol water content in Beijing in winter 2016. The markers represent aerosol water content and are colored by the PM<sub>2.5</sub> concentrations. The red curve represents the exponential fitting between RH and aerosol water content, i.e.,  $y=5.5 + 0.1e^{0.09x}$  ( $R^2 = 0.85$ ).

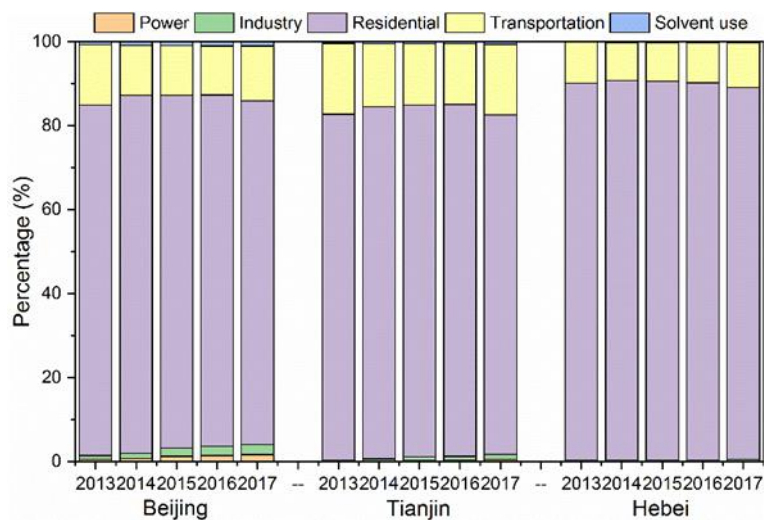

**Figure S11.** Emission percentages of HCHO across source sectors from 2013 to 2017 in Beijing-Tianjin-Hebei.

### References

Gelaro, R., McCarty, W., Suarez, M. J., Todling, R., Molod, A., Takacs, L., Randles, C. A., Darmenov, A., Bosilovich, M. G., Reichle, R., Wargan, K., Coy, L., Cullather, R., Draper, C., Akella, S., Buchard, V., Conaty, A., da Silva, A. M., Gu, W., Kim, G. K.,

94 Koster, R., Lucchesi, R., Merkova, D., Nielsen, J. E., Partyka, G., Pawson, S., Putman,  
95 W., Rienecker, M., Schubert, S. D., Sienkiewicz, M., and Zhao, B.: The Modern-Era  
96 Retrospective Analysis for Research and Applications, Version 2 (MERRA-2), *J. Clim.*,  
97 30, 5419–5454, <https://doi.org/10.1175/jcli-d-16-0758.1>, 2017.

98 Rao, Z. H., Chen, Z. M., Liang, H., Huang, L. B., and Huang, D.: Carbonyl compounds  
99 over urban Beijing: Concentrations on haze and non-haze days and effects on radical  
100 chemistry, *Atmos. Environ.*, 124, 207–216,  
101 <https://doi.org/10.1016/j.atmosenv.2015.06.050>, 2016.

102 Sheng, J., Zhao, D., Ding, D., Li, X., Huang, M., Gao, Y., Quan, J., and Zhang, Q.:  
103 Characterizing the level, photochemical reactivity, emission, and source contribution of  
104 the volatile organic compounds based on PTR-TOF-MS during winter haze period in  
105 Beijing, China, *Atmos. Res.*, 212, 54–63,  
106 <https://doi.org/10.1016/j.atmosres.2018.05.005>, 2018.

107 Song, S., Gao, M., Xu, W., Sun, Y., Worsnop, D. R., Jayne, J. T., Zhang, Y., Zhu, L., Li,  
108 M., Zhou, Z., Cheng, C., Lv, Y., Wang, Y., Peng, W., Xu, X., Lin, N., Wang, Y., Wang,  
109 S., Munger, J. W., Jacob, D. J., and McElroy, M. B.: Possible heterogeneous chemistry  
110 of hydroxymethanesulfonate (HMS) in northern China winter haze, *Atmos. Chem.*  
111 *Phys.*, 19, 1357–1371, <https://doi.org/10.5194/acp-19-1357-2019>, 2019.
